# Supplementary material
Source: MDPI journal article supplement (https://www.mdpi.com/2076-3263/12/6/247)
Supplement: s1 [file s1]

Archive with 5 entries (5 files):
- Figure_S1.pdf
- Figure_S2.pdf
- Table_S1.xlsx
- Table_S2.pdf
- Table_S3.pdf
