# Supplementary material
Source: MDPI journal article supplement (https://www.mdpi.com/2076-3263/12/6/247)
Supplement: s1 [file s1 › Table_S1.xlsx]

## Sheet: Sheet1
Supplementary Table S1: Summary Table showing Minimum, Maximum and Interquartile ranges for measured environmental parameters across the Puquio 1 – Puquio 2. system, separated by bottom type.
EC (µS/cm)	black domes	black semi-cohesive mat	floccules	network on bulbous mat	carpet	orange/brown bulbous mat	orange gel mat	orange gel mat with black pinnacles	spar
Min	33380	33730	20710	33250	24860	37910	24560	43530	41340
Q1 (25th percentile)	37267.5	35697.5	27002.5	38192.5	32750	43530	52795	79597.5	156800
Q2 (Median)	37975	38410	33250	42440	39230	50130	98190	100170	159000
Q3 (75th percentile)	42832.5	44665	40627.5	45452.5	42510	60007.5	132550	113950	164500
Max	45000	46120	147800	126700	59360	109800	163400	165300	165400
IQR	5565	8967.5	13625	7260	9760	16477.5	79755	34352.5	7700
Average	39124.2	39660	40704.8	45266.5	38560.2	55533.9	95509.6	95519.4	156318
Standard Deviation	3516.85	5014.63	24337.3	17592.9	8167.99	18350.3	41985.3	33015.5	21358.8
pH	black domes	black semi-cohesive mat	floccules	network on bulbous mat	carpet	orange/brown bulbous mat	orange gel mat	orange gel mat with black pinnacles	spar
Min	7.91	7.98	7.01	7.48	6.66	7.12	6.74	7.31	7.23
Q1 (25th percentile)	8.0475	7.995	7.965	8.015	8.03	7.9775	7.48	7.5075	7.895
Q2 (Median)	8.11	8.04	8.015	8.09	8.07	8.045	7.78	7.545	7.91
Q3 (75th percentile)	8.155	8.0825	8.1625	8.305	8.12	8.1575	8.05	7.8525	7.97
Max	8.3	8.1	8.36	8.4	8.12	8.29	8.4	8.06	8.02
IQR	0.1075	0.0875	0.1975	0.29	0.09	0.18	0.57	0.345	0.075
Average	8.10667	8.03875	7.98771	8.10692	8.04341	8.04658	7.76987	7.63437	7.86721
Standard Deviation	0.120479	0.0488255	0.257494	0.210386	0.24382	0.194981	0.349905	0.237626	0.19385
ORP (mV)	black domes	black semi-cohesive mat	floccules	network on bulbous mat	carpet	orange/brown bulbous mat	orange gel mat	orange gel mat with black pinnacles	spar
Min	-72.5	8.5	-380.9	-139.6	-388.9	-288.5	-375.1	-170.2	-20.9
Q1 (25th percentile)	6.925	15	-33.425	14.225	-3.3	-37.325	-62.65	-62.65	6.95
Q2 (Median)	17.05	25.8	14.7	20.55	22.6	6.7	-22	-25.4	9.5
Q3 (75th percentile)	54.425	47.175	56.85	28.6	33.7	23.025	9.4	13.25	12.3
Max	88.8	64	148.5	112.2	130.8	111.1	43.1	24.2	186.8
IQR	47.5	32.175	90.275	14.375	37	60.35	72.05	75.9	5.35
Average	23.1583	31.2	1.66667	17.4423	11.9927	-18.0895	-47.6347	-33.8187	14.2512
Standard Deviation	43.2758	20.1803	83.7182	50.1132	83.0348	79.0988	88.9478	56.3406	29.0388
DO (mg/L)	black domes	black semi-cohesive mat	floccules	network on bulbous mat	carpet	orange/brown bulbous mat	orange gel mat	orange gel mat with black pinnacles	spar
Min	1.72	1.84	0	2.24	0.48	0.4	0	0.19	0.13
Q1 (25th percentile)	2.7	2.44	2.4225	2.965	2.5	3.24	0.725	0.81	1.465
Q2 (Median)	3.21	3.59	3.19	3.6	2.83	3.72	2.45	1.625	1.74
Q3 (75th percentile)	3.5125	3.975	4.2175	4.3725	3.35	4.525	3.805	2.6725	1.865
Max	4.55	5.62	5.49	6.42	4.94	5.63	5.97	5.04	3.7
IQR	0.8125	1.535	1.795	1.4075	0.85	1.285	3.08	1.8625	0.4
Average	3.16833	3.44	3.13646	3.695	2.91366	3.73368	2.33987	1.85063	1.65628
Standard Deviation	0.762577	1.21753	1.34224	0.957606	0.922455	1.10038	1.69029	1.37894	0.571498
Depth (cm)	black domes	black semi-cohesive mat	floccules	network on bulbous mat	carpet	orange/brown bulbous mat	orange gel mat	orange gel mat with black pinnacles	spar
Min	5	5	5	5	5	5	5	30	10
Q1 (25th percentile)	16.25	5	5	10	5	6.25	20	35	25
Q2 (Median)	32.5	17.5	20	17.5	20	20	35	40	30
Q3 (75th percentile)	35	21.25	26.25	23.75	25	30	40	40	35
Max	35	35	45	45	60	40	55	50	50
IQR	18.75	16.25	21.25	13.75	20	23.75	20	5	10
Average	25.4167	16.25	18.5417	17.1154	20.2439	19.7368	30.72	38.4375	30.814
Standard Deviation	13.0486	10.9381	12.1146	10.3124	13.0839	12.0779	13.8998	5.07239	8.44663
Turbidity (FNU)	black domes	black semi-cohesive mat	floccules	network on bulbous mat	carpet	orange/brown bulbous mat	orange gel mat	orange gel mat with black pinnacles	spar
Min	1.9	1.6	0.6	0.3	2.3	0.8	0.3	1.2	0.3
Q1 (25th percentile)	2.95	5.775	10.05	1.825	3.6	1.65	2	1.65	0.4
Q2 (Median)	3.9	7.2	23.35	2.7	7.6	3.45	5.1	3.45	0.5
Q3 (75th percentile)	6.575	21.15	42.4	4.55	17.1	8.825	23.2	4.375	0.7
Max	18.9	46.4	334.7	52.2	862.7	723.3	1000	58.5	39.7
IQR	3.625	15.375	32.35	2.725	13.5	7.175	21.2	2.725	0.3
Average	5.96667	15.6875	53.775	5.74231	44.2707	28.0079	35.4627	10.325	1.85116
Standard Deviation	5.0115	16.8931	82.5384	10.1326	146.112	117.024	123.336	18.8921	6.05693
